# Supplementary material for: Pre-metastatic cancer exosomes induce immune surveillance by patrolling monocytes at the metastatic niche
Source: PubMed Central journal article supplement (PMC5673063; doi:10.1038/s41467-017-01433-3), 2017-11-06
Supplement: 41467_2017_1433_MOESM3_ESM.pdf [file 41467_2017_1433_MOESM3_ESM.pdf]

## **Description of Additional Supplementary Files**

File Name: Supplementary Movie 1

Description: The effect of ExoM on macrophage differentiation. RAW 264.7 macrophages were plated in glass bottom plates and treated with 3  $\mu\text{g}/\text{ml}$  of ExoM. Images were taken every 15 minutes for 16 hours focusing on the formation of dendritelike processes.

File Name: Supplementary Movie 2

Description: The effect of ExoNM on macrophage differentiation. Time-lapse images of RAW264.7 macrophages treated with 3  $\mu\text{g}/\text{ml}$  of ExoNM. Images were taken every 15 minutes for 16 hours focusing on the formation of dendrite-like processes.
